# Supplementary material for: Assessing economic impacts of future GLOFs in Nepal’s Everest region under different SSP scenarios using three-dimensional simulations
Source: Copernicus journal article supplement (doi:10.5194/egusphere-2025-50), 2025-02-25
Supplement: Supplementary file 1 [file egusphere-2025-50-supplement.zip]

## Sheet: breach_dependentVolumes
SSP	Year	LakeID	LakeName	TotalVolume	volume_BR1	volume_BR2	volume_BR3		%_BR1	%_BR2	%_BR3
245	2040	RGI60-15.03422	Bhote Tsho	2.60612e+07	8.68308e+06	1.61977e+07	2.18101e+07		33.3181	62.1527	83.6879
245	2060	RGI60-15.03422	Bhote Tsho	2.89699e+07	9.69676e+06	1.81395e+07	2.44591e+07		33.4718	62.6148	84.4294
245	2080	RGI60-15.03422	Bhote Tsho	4.91459e+07	1.70965e+07	3.21521e+07	4.32396e+07		34.7873	65.4218	87.982
245	2100	RGI60-15.03422	Bhote Tsho	1.07247e+08	4.80786e+07	8.16144e+07	100681538		44.8296	76.0992	93.8778
585	2040	RGI60-15.03422	Bhote Tsho	2.60612e+07	8.68308e+06	1.61977e+07	2.18101e+07		33.3181	62.1527	83.6879
585	2060	RGI60-15.03422	Bhote Tsho	2.89699e+07	9.69676e+06	1.81395e+07	2.44591e+07		33.4718	62.6148	84.4294
585	2080	RGI60-15.03422	Bhote Tsho	7.55047e+07	2.90992e+07	5.33706e+07	6.91451e+07		38.5395	70.6852	91.5772
585	2100	RGI60-15.03422	Bhote Tsho	1.12306e+08	5.27896e+07	8.66716e+07	1.05742e+08		47.0051	77.1744	94.1554
245	2040	RGI60-15.03743	Imja Tsho	1.11601e+08	4.48346e+07	8.00465e+07	103615789		40.1741	71.7258	92.8451
245	2060	RGI60-15.03743	Imja Tsho	1.19488e+08	4.49728e+07	8.07398e+07	1.05415e+08		37.638	67.5716	88.222
245	2080	RGI60-15.03743	Imja Tsho	1.97686e+08	7.34031e+07	1.29579e+08	1.67812e+08		37.1312	65.548	84.8884
245	2100	RGI60-15.03743	Imja Tsho	2.07579e+08	8.14959e+07	1.39478e+08	1.77705e+08		39.2602	67.1927	85.6084
585	2040	RGI60-15.03743	Imja Tsho	112242531	4.48388e+07	8.00871e+07	1.03717e+08		39.9482	71.3519	92.404
585	2060	RGI60-15.03743	Imja Tsho	1.30614e+08	4.62287e+07	8.37259e+07	110684366		35.3933	64.1017	84.7414
585	2080	RGI60-15.03743	Imja Tsho	2.0584e+08	7.99429e+07	1.37732e+08	175962664		38.8374	66.912	85.4852
585	2100	RGI60-15.03743	Imja Tsho	209479041	8.33764e+07	1.41368e+08	1.79608e+08		39.8018	67.4856	85.7403
245	2040	RGI60-15.03366	Lower Barun Lake	8.34677e+07	4.43861e+07	6.95692e+07	7.88072e+07		53.1776	83.3487	94.4164
245	2060	RGI60-15.03366	Lower Barun Lake	1.05344e+08	4.80025e+07	8.02558e+07	9.71781e+07		45.5672	76.1843	92.248
245	2080	RGI60-15.03366	Lower Barun Lake	1.26221e+08	5.605e+07	9.52291e+07	1.16634e+08		44.4062	75.4463	92.4044
245	2100	RGI60-15.03366	Lower Barun Lake	1.37652e+08	6.20185e+07	1.05154e+08	1.28061e+08		45.0545	76.3913	93.0319
585	2040	RGI60-15.03366	Lower Barun Lake	8.60363e+07	4.44797e+07	7.01214e+07	8.03859e+07		51.6988	81.5021	93.4325
585	2060	RGI60-15.03366	Lower Barun Lake	1.27818e+08	5.6834e+07	9.65908e+07	1.18234e+08		44.4646	75.5688	92.5012
585	2080	RGI60-15.03366	Lower Barun Lake	1.41792e+08	6.52034e+07	1.09238e+08	1.32198e+08		45.9854	77.0409	93.2337
585	2100	RGI60-15.03366	Lower Barun Lake	1.41792e+08	6.52034e+07	1.09238e+08	1.32198e+08		45.9854	77.0409	93.2337
245	2040	RGI60-15.03473	Ngojumba Tsho	1.23726e+08	2.20721e+07	4.30009e+07	6.15482e+07		17.8395	34.7551	49.7457
245	2060	RGI60-15.03473	Ngojumba Tsho	1.3839e+08	2.44984e+07	4.77586e+07	6.84507e+07		17.7024	34.5101	49.4621
245	2080	RGI60-15.03473	Ngojumba Tsho	2.84034e+08	5.00054e+07	9.77536e+07	1.40861e+08		17.6054	34.4162	49.5931
245	2100	RGI60-15.03473	Ngojumba Tsho	5.80007e+08	1.1907e+08	2.30203e+08	3.29574e+08		20.529	39.6896	56.8225
585	2040	RGI60-15.03473	Ngojumba Tsho	1.23726e+08	2.20721e+07	4.30009e+07	6.15482e+07		17.8395	34.7551	49.7457
585	2060	RGI60-15.03473	Ngojumba Tsho	1.40953e+08	2.48739e+07	4.85112e+07	6.95789e+07		17.647	34.4167	49.3634
585	2080	RGI60-15.03473	Ngojumba Tsho	3.78204e+08	6.9495e+07	1.35575e+08	1.95234e+08		18.375	35.8471	51.6213
585	2100	RGI60-15.03473	Ngojumba Tsho	7.24482e+08	1.83246e+08	3.34789e+08	459660098		25.2934	46.2108	63.4467
245	2040	RGI60-15.03448	Tsho Rolpa	1.04124e+08	4.8409e+07	7.82865e+07	9.61794e+07		46.4919	75.1861	92.3704
245	2060	RGI60-15.03448	Tsho Rolpa	1.04124e+08	4.8409e+07	7.82865e+07	9.61794e+07		46.4919	75.1861	92.3704
245	2080	RGI60-15.03448	Tsho Rolpa	1.04124e+08	4.8409e+07	7.82865e+07	9.61794e+07		46.4919	75.1861	92.3704
245	2100	RGI60-15.03448	Tsho Rolpa	1.04124e+08	4.8409e+07	7.82865e+07	9.61794e+07		46.4919	75.1861	92.3704
585	2040	RGI60-15.03448	Tsho Rolpa	1.04124e+08	4.8409e+07	7.82865e+07	9.61794e+07		46.4919	75.1861	92.3704
585	2060	RGI60-15.03448	Tsho Rolpa	1.04124e+08	4.8409e+07	7.82865e+07	9.61794e+07		46.4919	75.1861	92.3704
585	2080	RGI60-15.03448	Tsho Rolpa	1.04124e+08	4.8409e+07	7.82865e+07	9.61794e+07		46.4919	75.1861	92.3704
585	2100	RGI60-15.03448	Tsho Rolpa	1.04124e+08	4.8409e+07	7.82865e+07	9.61794e+07		46.4919	75.1861	92.3704

## Sheet: rest
Elevation	AdjustedVolume1	AdjustedVolume2	AdjustedVolume3
4758	1.73781e+07	9.86346e+06	4.25112e+06
4758	1.92732e+07	1.08305e+07	4.5108e+06
4758	3.20494e+07	1.69938e+07	5.90637e+06
4758	5.91688e+07	2.5633e+07	6.56587e+06
4758	1.73781e+07	9.86346e+06	4.25112e+06
4758	1.92732e+07	1.08305e+07	4.5108e+06
4758	4.64056e+07	2.21341e+07	6.35958e+06
4758	5.95166e+07	2.56345e+07	6.56384e+06
4981	66766111	3.15542e+07	7.98496e+06
4981	7.45151e+07	3.8748e+07	1.40733e+07
4981	124282873	6.81067e+07	2.98735e+07
4981	1.26083e+08	6.81009e+07	2.98739e+07
4981	6.74037e+07	3.21554e+07	8.52596e+06
4981	8.43855e+07	4.68884e+07	1.99299e+07
4981	1.25897e+08	6.81084e+07	2.98773e+07
4981	1.26103e+08	6.81109e+07	2.98711e+07
4502	3.90816e+07	1.38984e+07	4.66051e+06
4502	57341881	2.50885e+07	8.16632e+06
4502	7.01711e+07	3.0992e+07	9.5873e+06
4502	7.56337e+07	3.24979e+07	9.5917e+06
4502	4.15566e+07	1.59149e+07	5.6504e+06
4502	7.09845e+07	3.12276e+07	9.58484e+06
4502	7.65882e+07	3.25541e+07	9.59402e+06
4502	7.65882e+07	3.25541e+07	9.59402e+06
4672	1.01654e+08	8.07247e+07	6.21774e+07
4672	1.13892e+08	9.06316e+07	6.99395e+07
4672	2.34028e+08	1.8628e+08	143172499
4672	4.60937e+08	3.49805e+08	2.50433e+08
4672	1.01654e+08	8.07247e+07	6.21774e+07
4672	1.16079e+08	9.24413e+07	7.13736e+07
4672	308708783	2.42629e+08	1.8297e+08
4672	5.41236e+08	3.89693e+08	2.64822e+08
4521	5.57146e+07	2.58372e+07	7.94423e+06
4521	5.57146e+07	2.58372e+07	7.94423e+06
4521	5.57146e+07	2.58372e+07	7.94423e+06
4521	5.57146e+07	2.58372e+07	7.94423e+06
4521	5.57146e+07	2.58372e+07	7.94423e+06
4521	5.57146e+07	2.58372e+07	7.94423e+06
4521	5.57146e+07	2.58372e+07	7.94423e+06
4521	5.57146e+07	2.58372e+07	7.94423e+06
