# Supplementary material for: Assessing economic impacts of future GLOFs in Nepal’s Everest region under different SSP scenarios using three-dimensional simulations
Source: Copernicus journal article supplement (doi:10.5194/egusphere-2025-50), 2025-02-25
Supplement: Supplementary file 2 [file Supplementary Table 1.xlsx]

## Sheet: Tabelle1
Lake	Distance	Elevation difference	Mean	Affected		Affected		Affected
			velocity	buildings		agricultural area		roads
	km	m	m/s	Count	Mean inundation depth	km2	Mean inundation depth	km
Tsho Rolpa	90.9	4059	8.6	3142	7.48 m	2.92	8.62 m	137.2
Bhote Tsho	116.9	4455	7.4	997	7.92 m	3.95	6.92 m	102.3
Ngojumba Tsho	123.6	4405	7.7	1419	11.34 m	4.14	12.21 m	129.9
Imja Tsho	122.5	4630	7.6	1358	8.24 m	3.55	9.19 m	115.9
Lower Barun Lake	112.2	4326	7	998	8.7 m	0.97	10.59 m	103.1
